# Supplementary material for: On-line generated ozone as a reactive cell gas for tandem quadrupole inductively coupled plasma mass spectrometry
Source: Royal Society of Chemistry journal article supplement (doi:10.1039/d4cc00636d), 2024-01-01
Supplement: d4cc00636d1.pdf [file d4cc00636d1.pdf]

### Supporting Information

## On-line generated ozone as a reactive cell gas for tandem quadrupole inductively coupled plasma mass spectrometry

Yanbei Zhu

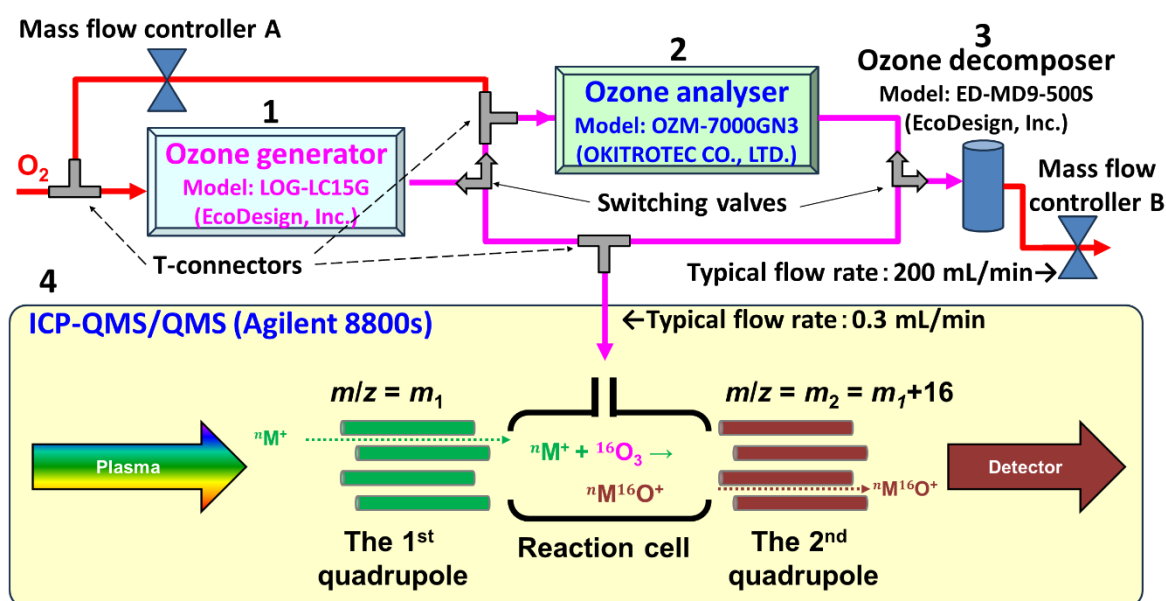

Fig. S1 Experimental system used in the present work (switching valves position for ozone analysis)

**Table S1** Percentage of product ions obtained with oxygen reaction and ozone reaction.

| Element | m/z | O <sub>2</sub> reaction |                 |                  |                              | O <sub>3</sub> reaction |                 |                  |                              |
|---------|-----|-------------------------|-----------------|------------------|------------------------------|-------------------------|-----------------|------------------|------------------------------|
|         |     | M <sup>+</sup>          | MO <sup>+</sup> | MOH <sup>+</sup> | MO <sub>2</sub> <sup>+</sup> | M <sup>+</sup>          | MO <sup>+</sup> | MOH <sup>+</sup> | MO <sub>2</sub> <sup>+</sup> |
| Li      | 7   | 99.7%                   | 0.0%            | 0.0%             | 0.3%                         | 99.9%                   | 0.0%            | 0.0%             | 0.1%                         |
| Be      | 9   | 62.7%                   | 3.1%            | 32.8%            | 1.4%                         | 69.2%                   | 14.4%           | 3.7%             | 12.7%                        |
| B       | 11  | 90.9%                   | 5.0%            | 2.5%             | 1.6%                         | 83.2%                   | 7.4%            | 0.7%             | 8.7%                         |
| C       | 12  | 36.8%                   | 58.0%           | 4.3%             | 0.9%                         | 46.4%                   | 44.3%           | 1.6%             | 7.7%                         |
| N       | 14  | 0.7%                    | 94.2%           | 0.2%             | 4.9%                         | 0.8%                    | 97.3%           | 0.8%             | 1.1%                         |
| O       | 16  | 10.3%                   | 89.5%           | 0.1%             | 0.1%                         | 2.4%                    | 97.4%           | 0.1%             | 0.1%                         |
| Na      | 23  | 99.9%                   | 0.0%            | 0.0%             | 0.0%                         | 99.9%                   | 0.0%            | 0.0%             | 0.0%                         |
| Mg      | 24  | 96.0%                   | 0.9%            | 3.0%             | 0.0%                         | 45.6%                   | 30.2%           | 23.1%            | 1.1%                         |
| Al      | 27  | 95.4%                   | 1.5%            | 3.1%             | 0.0%                         | 67.5%                   | 20.1%           | 10.1%            | 2.3%                         |
| Si      | 28  | 28.4%                   | 6.9%            | 64.3%            | 0.4%                         | 37.6%                   | 38.0%           | 11.1%            | 13.3%                        |
| P       | 31  | 5.4%                    | 93.8%           | 0.6%             | 0.2%                         | 7.8%                    | 79.9%           | 0.4%             | 12.0%                        |
| S       | 34  | 38.7%                   | 60.4%           | 0.8%             | 0.1%                         | 52.8%                   | 43.5%           | 0.1%             | 3.6%                         |
| Cl      | 35  | 15.1%                   | 84.1%           | 0.3%             | 0.5%                         | 8.1%                    | 90.5%           | 0.2%             | 1.3%                         |
| K       | 39  | 100.0%                  | 0.0%            | 0.0%             | 0.0%                         | 99.9%                   | 0.0%            | 0.0%             | 0.0%                         |
| Ca      | 44  | 84.2%                   | 1.6%            | 13.7%            | 0.5%                         | 53.6%                   | 16.6%           | 22.7%            | 7.1%                         |
| Sc      | 45  | 6.0%                    | 93.5%           | 0.1%             | 0.3%                         | 5.1%                    | 72.0%           | 0.1%             | 22.9%                        |
| Ti      | 47  | 7.5%                    | 91.2%           | 0.1%             | 1.2%                         | 5.4%                    | 44.6%           | 0.0%             | 49.9%                        |
| V       | 51  | 10.1%                   | 87.8%           | 0.0%             | 2.1%                         | 9.7%                    | 31.9%           | 0.0%             | 58.3%                        |
| Cr      | 52  | 89.9%                   | 9.8%            | 0.0%             | 0.2%                         | 27.3%                   | 35.8%           | 0.1%             | 36.9%                        |
| Mn      | 55  | 93.7%                   | 4.5%            | 1.9%             | 0.0%                         | 39.9%                   | 38.6%           | 1.6%             | 19.9%                        |
| Fe      | 56  | 90.1%                   | 9.4%            | 0.5%             | 0.1%                         | 41.8%                   | 47.7%           | 0.9%             | 9.5%                         |
| Co      | 59  | 91.6%                   | 8.2%            | 0.1%             | 0.0%                         | 40.5%                   | 51.0%           | 0.5%             | 8.0%                         |
| Ni      | 60  | 96.9%                   | 2.8%            | 0.3%             | 0.0%                         | 43.5%                   | 45.1%           | 0.5%             | 10.9%                        |
| Cu      | 63  | 99.9%                   | 0.1%            | 0.0%             | 0.0%                         | 71.5%                   | 20.1%           | 0.0%             | 8.4%                         |
| Zn      | 66  | 99.5%                   | 0.2%            | 0.3%             | 0.0%                         | 56.3%                   | 35.9%           | 3.8%             | 4.0%                         |
| Ga      | 71  | 100.0%                  | 0.0%            | 0.0%             | 0.0%                         | 100.0%                  | 0.0%            | 0.0%             | 0.0%                         |
| Ge      | 72  | 75.2%                   | 4.0%            | 19.8%            | 0.9%                         | 19.7%                   | 24.9%           | 43.5%            | 11.9%                        |
| As      | 75  | 10.0%                   | 89.5%           | 0.2%             | 0.3%                         | 6.3%                    | 90.9%           | 0.1%             | 2.7%                         |
| Se      | 77  | 79.6%                   | 15.7%           | 0.1%             | 4.7%                         | 43.4%                   | 40.5%           | 0.0%             | 16.1%                        |
| Se      | 78  | 79.3%                   | 20.5%           | 0.1%             | 0.0%                         | 35.5%                   | 46.1%           | 0.1%             | 18.3%                        |
| Br      | 79  | 89.2%                   | 4.8%            | 5.8%             | 0.2%                         | 43.7%                   | 48.9%           | 0.5%             | 7.0%                         |
| Se      | 82  | 83.8%                   | 16.1%           | 0.0%             | 0.0%                         | 39.4%                   | 44.8%           | 0.1%             | 15.6%                        |

| Element | m/z | O <sub>2</sub> reaction |                 |                  |                              | O <sub>3</sub> reaction |                 |                  |                              |
|---------|-----|-------------------------|-----------------|------------------|------------------------------|-------------------------|-----------------|------------------|------------------------------|
|         |     | M <sup>+</sup>          | MO <sup>+</sup> | MOH <sup>+</sup> | MO <sub>2</sub> <sup>+</sup> | M <sup>+</sup>          | MO <sup>+</sup> | MOH <sup>+</sup> | MO <sub>2</sub> <sup>+</sup> |
| Rb      | 85  | 100.0%                  | 0.0%            | 0.0%             | 0.0%                         | 100.0%                  | 0.0%            | 0.0%             | 0.0%                         |
| Sr      | 88  | 87.3%                   | 2.0%            | 10.3%            | 0.4%                         | 20.8%                   | 37.0%           | 31.0%            | 11.3%                        |
| Y       | 89  | 2.6%                    | 96.5%           | 0.2%             | 0.7%                         | 1.8%                    | 67.9%           | 0.1%             | 30.2%                        |
| Zr      | 90  | 1.8%                    | 86.9%           | 0.1%             | 11.3%                        | 1.2%                    | 34.8%           | 0.0%             | 64.0%                        |
| Nb      | 93  | 2.0%                    | 12.8%           | 0.0%             | 85.2%                        | 1.9%                    | 16.0%           | 0.0%             | 82.1%                        |
| Mo      | 95  | 18.6%                   | 9.9%            | 0.0%             | 71.5%                        | 15.5%                   | 22.7%           | 0.0%             | 61.8%                        |
| Ru      | 101 | 89.2%                   | 10.6%           | 0.0%             | 0.2%                         | 34.9%                   | 38.3%           | 0.0%             | 26.8%                        |
| Rh      | 103 | 98.1%                   | 1.9%            | 0.0%             | 0.0%                         | 43.2%                   | 33.3%           | 0.0%             | 23.5%                        |
| Pd      | 105 | 99.8%                   | 0.1%            | 0.0%             | 0.0%                         | 62.7%                   | 25.8%           | 0.1%             | 11.4%                        |
| Ag      | 107 | 100.0%                  | 0.0%            | 0.0%             | 0.0%                         | 99.8%                   | 0.1%            | 0.0%             | 0.0%                         |
| Cd      | 111 | 99.8%                   | 0.1%            | 0.0%             | 0.0%                         | 52.8%                   | 30.1%           | 17.0%            | 0.1%                         |
| In      | 115 | 100.0%                  | 0.0%            | 0.0%             | 0.0%                         | 99.1%                   | 0.5%            | 0.3%             | 0.0%                         |
| Sn      | 118 | 97.9%                   | 1.1%            | 0.9%             | 0.1%                         | 31.6%                   | 40.9%           | 24.1%            | 3.4%                         |
| Sb      | 121 | 78.4%                   | 21.5%           | 0.1%             | 0.1%                         | 17.9%                   | 80.4%           | 0.1%             | 1.6%                         |
| Te      | 125 | 92.9%                   | 7.1%            | 0.0%             | 0.0%                         | 45.8%                   | 43.8%           | 0.2%             | 10.3%                        |
| I       | 127 | 97.4%                   | 2.6%            | 0.0%             | 0.0%                         | 26.4%                   | 60.7%           | 0.1%             | 12.8%                        |
| Cs      | 133 | 100.0%                  | 0.0%            | 0.0%             | 0.0%                         | 100.0%                  | 0.0%            | 0.0%             | 0.0%                         |
| Ba      | 137 | 83.0%                   | 4.1%            | 12.4%            | 0.5%                         | 13.5%                   | 46.9%           | 24.6%            | 14.9%                        |
| La      | 139 | 0.7%                    | 98.1%           | 0.1%             | 1.1%                         | 0.3%                    | 97.0%           | 0.1%             | 2.6%                         |
| Ce      | 140 | 0.2%                    | 98.6%           | 0.1%             | 1.1%                         | 0.1%                    | 31.9%           | 0.0%             | 68.0%                        |
| Pr      | 141 | 0.3%                    | 99.2%           | 0.1%             | 0.5%                         | 0.2%                    | 38.2%           | 0.0%             | 61.6%                        |
| Nd      | 146 | 0.4%                    | 99.1%           | 0.2%             | 0.4%                         | 0.2%                    | 46.5%           | 0.0%             | 53.2%                        |
| Sm      | 147 | 4.7%                    | 94.4%           | 0.6%             | 0.3%                         | 2.2%                    | 84.4%           | 0.3%             | 13.2%                        |
| Eu      | 153 | 80.0%                   | 14.3%           | 5.2%             | 0.5%                         | 16.3%                   | 70.7%           | 2.1%             | 10.9%                        |
| Gd      | 157 | 8.4%                    | 90.8%           | 0.2%             | 0.7%                         | 3.7%                    | 75.8%           | 0.1%             | 20.3%                        |
| Tb      | 159 | 0.8%                    | 98.5%           | 0.1%             | 0.6%                         | 0.5%                    | 72.2%           | 0.1%             | 27.3%                        |
| Dy      | 163 | 1.2%                    | 98.3%           | 0.1%             | 0.3%                         | 0.8%                    | 76.8%           | 0.1%             | 22.3%                        |
| Ho      | 165 | 1.3%                    | 98.2%           | 0.1%             | 0.4%                         | 0.8%                    | 71.1%           | 0.1%             | 27.9%                        |
| Er      | 166 | 1.4%                    | 98.0%           | 0.1%             | 0.5%                         | 0.9%                    | 68.4%           | 0.1%             | 30.6%                        |
| Tm      | 169 | 21.8%                   | 77.8%           | 0.2%             | 0.2%                         | 9.5%                    | 64.8%           | 0.3%             | 25.3%                        |
| Yb      | 172 | 89.0%                   | 8.2%            | 2.6%             | 0.2%                         | 42.1%                   | 49.5%           | 3.5%             | 4.9%                         |
| Lu      | 175 | 2.8%                    | 96.4%           | 0.2%             | 0.6%                         | 1.9%                    | 62.4%           | 0.2%             | 35.4%                        |
| Hf      | 178 | 0.6%                    | 76.1%           | 0.0%             | 23.3%                        | 0.5%                    | 41.1%           | 0.0%             | 58.4%                        |
| Ta      | 181 | 0.6%                    | 8.5%            | 0.0%             | 90.9%                        | 0.5%                    | 8.7%            | 0.0%             | 90.8%                        |

| Element | m/z | O <sub>2</sub> reaction |                 |                  |                              | O <sub>3</sub> reaction |                 |                  |                              |
|---------|-----|-------------------------|-----------------|------------------|------------------------------|-------------------------|-----------------|------------------|------------------------------|
|         |     | M <sup>+</sup>          | MO <sup>+</sup> | MOH <sup>+</sup> | MO <sub>2</sub> <sup>+</sup> | M <sup>+</sup>          | MO <sup>+</sup> | MOH <sup>+</sup> | MO <sub>2</sub> <sup>+</sup> |
| W       | 182 | 1.1%                    | 12.8%           | 0.0%             | 86.0%                        | 1.2%                    | 14.8%           | 0.1%             | 84.0%                        |
| Re      | 185 | 53.6%                   | 12.5%           | 0.0%             | 33.9%                        | 26.1%                   | 23.5%           | 0.0%             | 50.4%                        |
| Os      | 189 | 45.0%                   | 23.6%           | 0.0%             | 31.4%                        | 23.0%                   | 38.0%           | 0.0%             | 39.0%                        |
| Ir      | 193 | 88.6%                   | 8.8%            | 0.0%             | 2.6%                         | 35.7%                   | 45.2%           | 0.0%             | 19.0%                        |
| Pt      | 195 | 98.3%                   | 1.6%            | 0.0%             | 0.0%                         | 37.9%                   | 43.8%           | 0.1%             | 18.2%                        |
| Au      | 197 | 98.9%                   | 1.1%            | 0.0%             | 0.0%                         | 43.3%                   | 24.9%           | 0.0%             | 31.8%                        |
| Hg      | 201 | 96.7%                   | 1.6%            | 0.0%             | 1.6%                         | 70.0%                   | 23.5%           | 0.1%             | 6.5%                         |
| Tl      | 205 | 100.0%                  | 0.0%            | 0.0%             | 0.0%                         | 100.0%                  | 0.0%            | 0.0%             | 0.0%                         |
| Pb      | 208 | 99.5%                   | 0.3%            | 0.2%             | 0.0%                         | 42.9%                   | 47.0%           | 10.1%            | 0.1%                         |
| Bi      | 209 | 98.4%                   | 1.6%            | 0.0%             | 0.0%                         | 43.1%                   | 56.9%           | 0.0%             | 0.0%                         |
| Th      | 232 | 0.1%                    | 99.9%           | 0.1%             | -                            | 0.1%                    | 99.9%           | 0.0%             | -                            |
| U       | 238 | 1.1%                    | 98.8%           | 0.1%             | -                            | 0.7%                    | 99.3%           | 0.0%             | -                            |
